# Supplementary material for: An 18-yr long (1993–2011) snow and meteorological dataset from a mid-altitude mountain site (Col de Porte, France, 1325 m alt.) for driving and evaluating snowpack models
Source: Copernicus journal article supplement (doi:10.5194/essd-4-13-2012), 2012-07-06
Supplement: Supplementary file 3 [file essd-4-13-2012-supplement.zip]

# A 18-years long snow and meteorological dataset from a mid-altitude mountain site (Col de Porte, France) for driving and evaluating snowpack models

## Supplementary material

S. Morin<sup>a</sup>, Y. Lejeune<sup>a</sup>, B. Lesaffre<sup>a</sup>, J.-M. Panel<sup>a</sup>, D. Poncet<sup>a</sup>, P. David<sup>a</sup>,  
M. Sudul<sup>a</sup>

*<sup>a</sup>Météo-France / CNRS, CNRM – GAME URA 1357, CEN, Grenoble, France*

---

### Abstract

Overview of in-situ meteorological data from the Col de Porte experimental site (1325 m altitude, 45.3°N, 5.77°E) from 1993 to 2011. The shaded areas represent periods in summertime where in-situ data were replaced by SAFRAN reanalysis data.

---

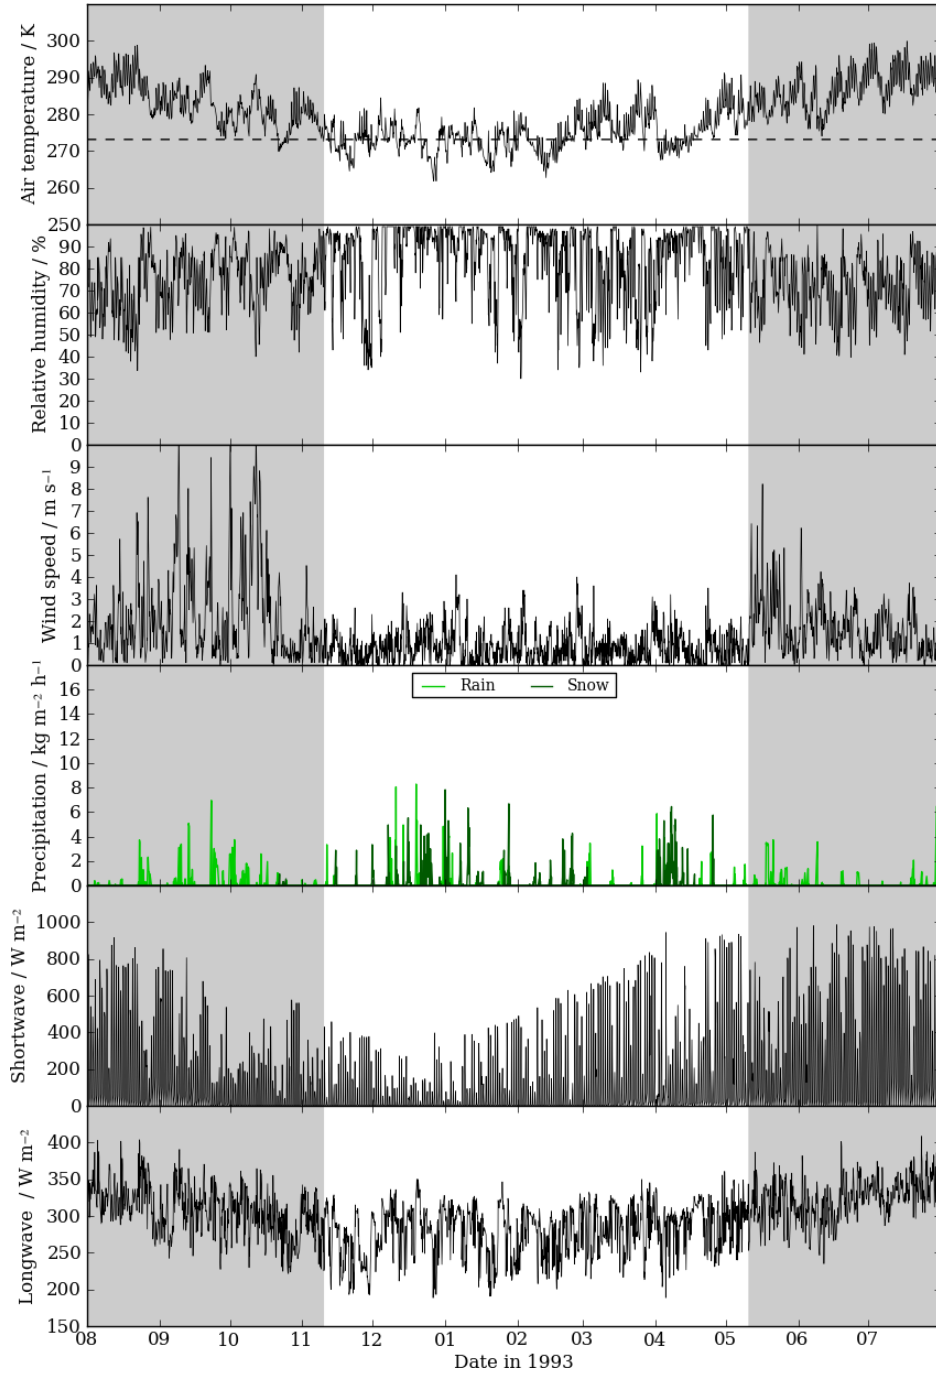

Figure 1: Meteorological data for year 1993-1994.

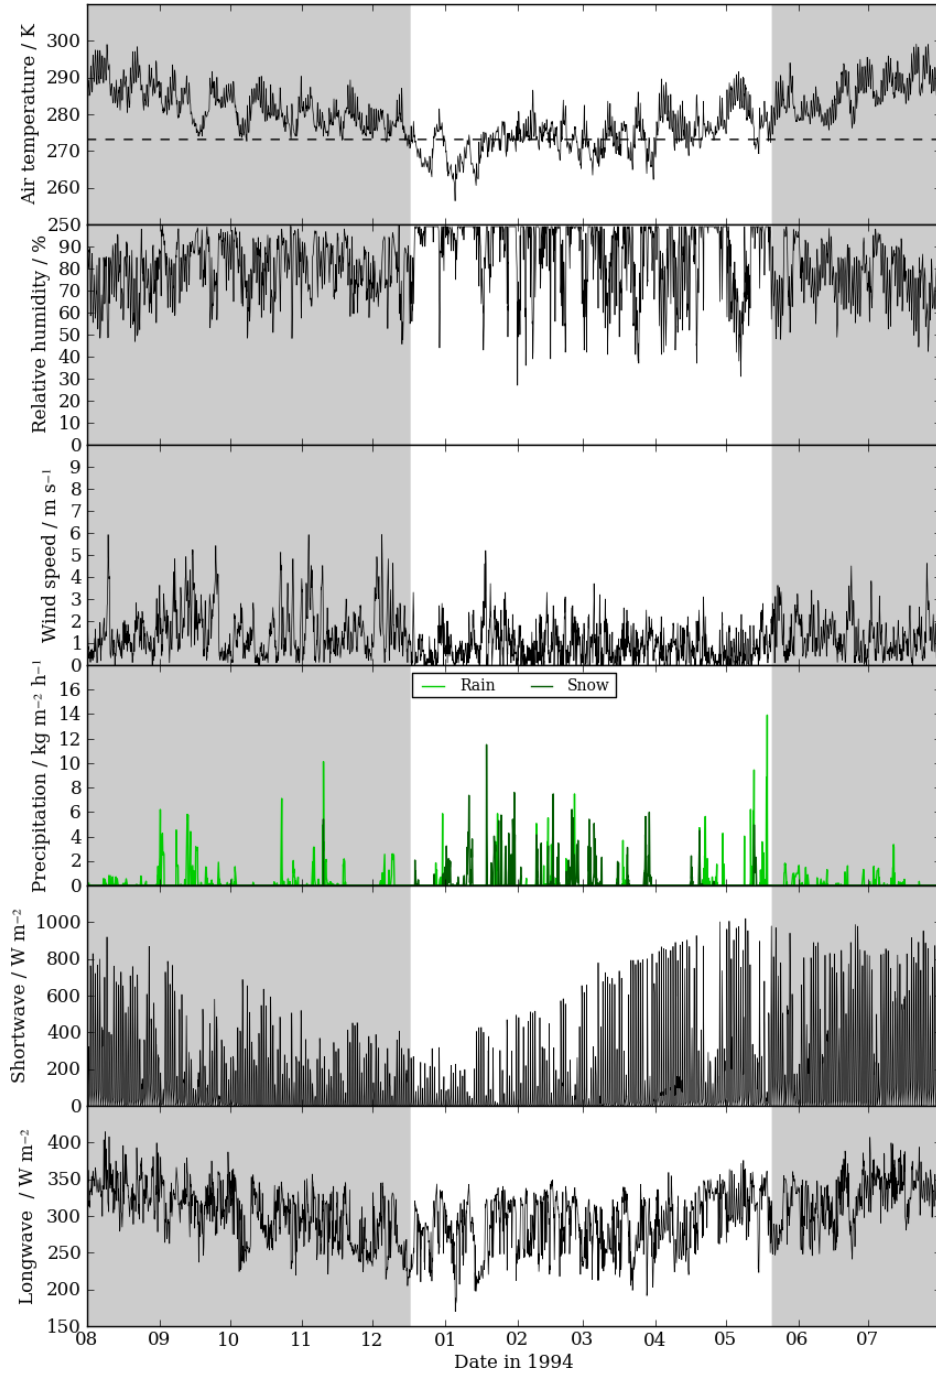

Figure 2: Meteorological data for year 1994-1995.

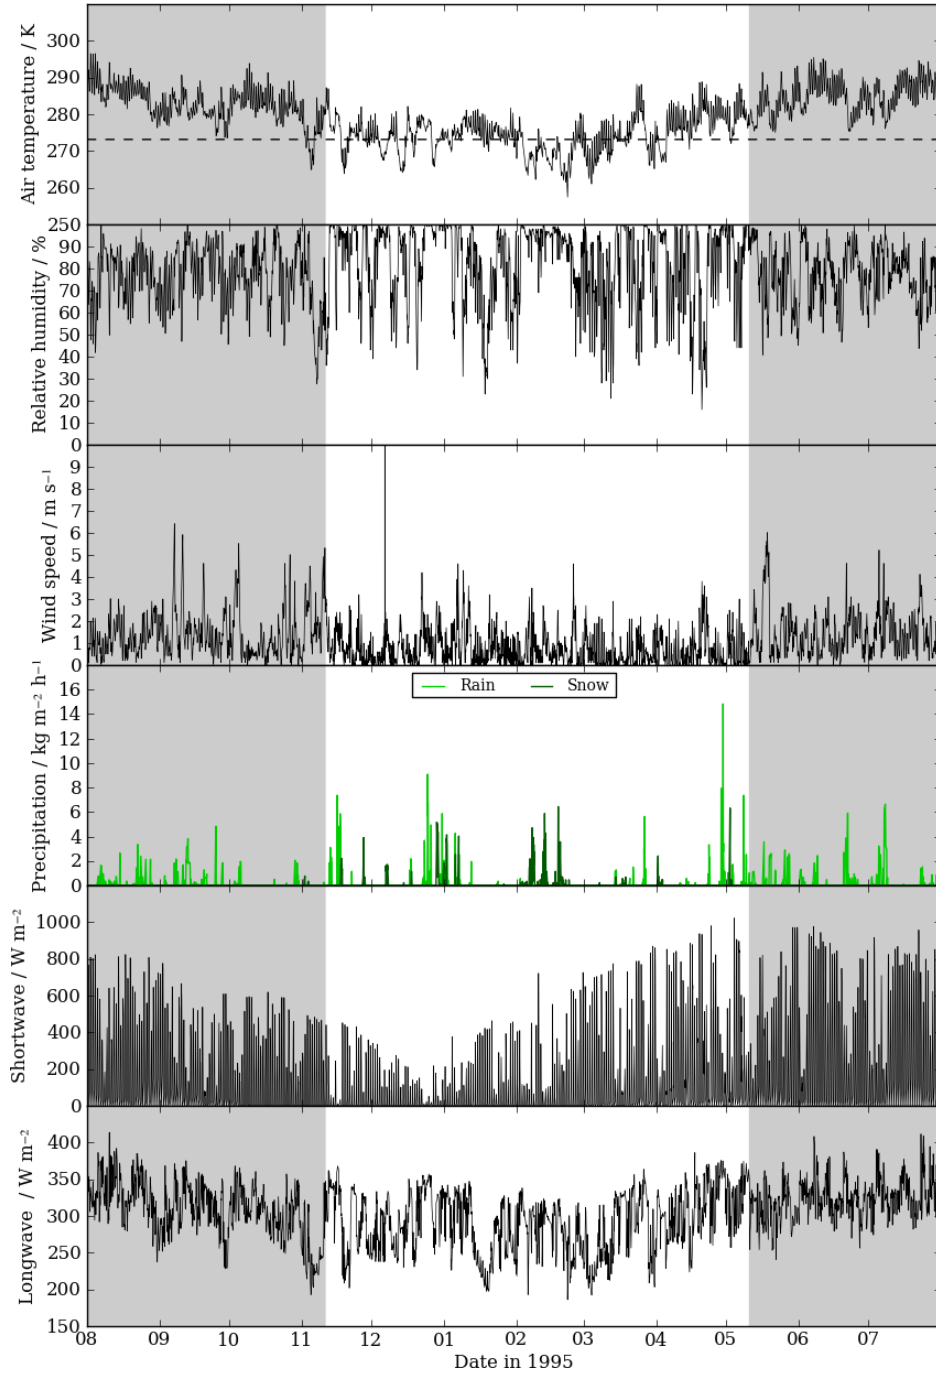

Figure 3: Meteorological data for year 1995-1996.

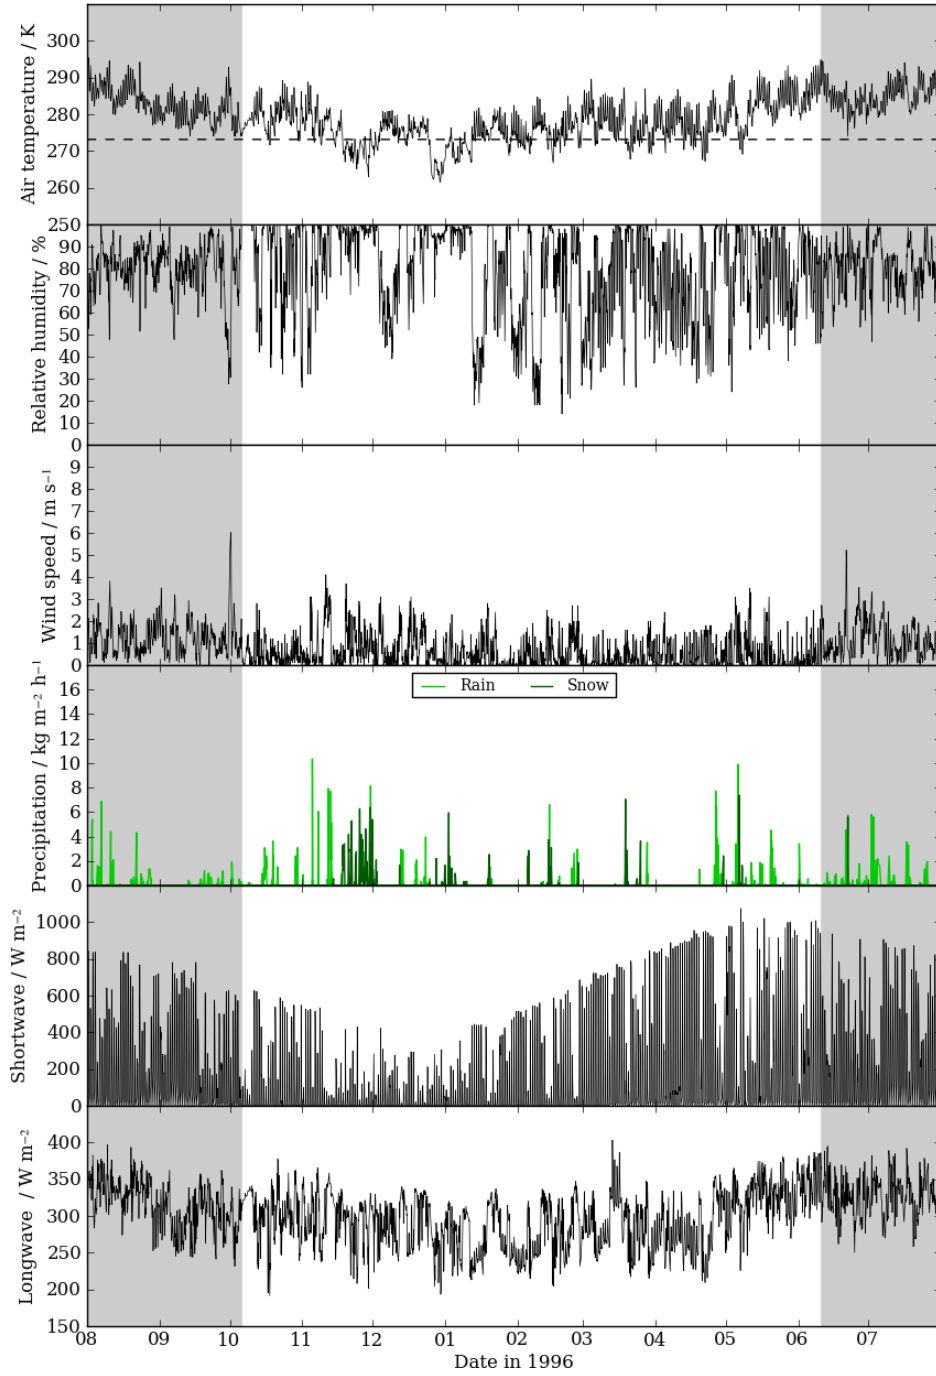

Figure 4: Meteorological data for year 1996-1997.

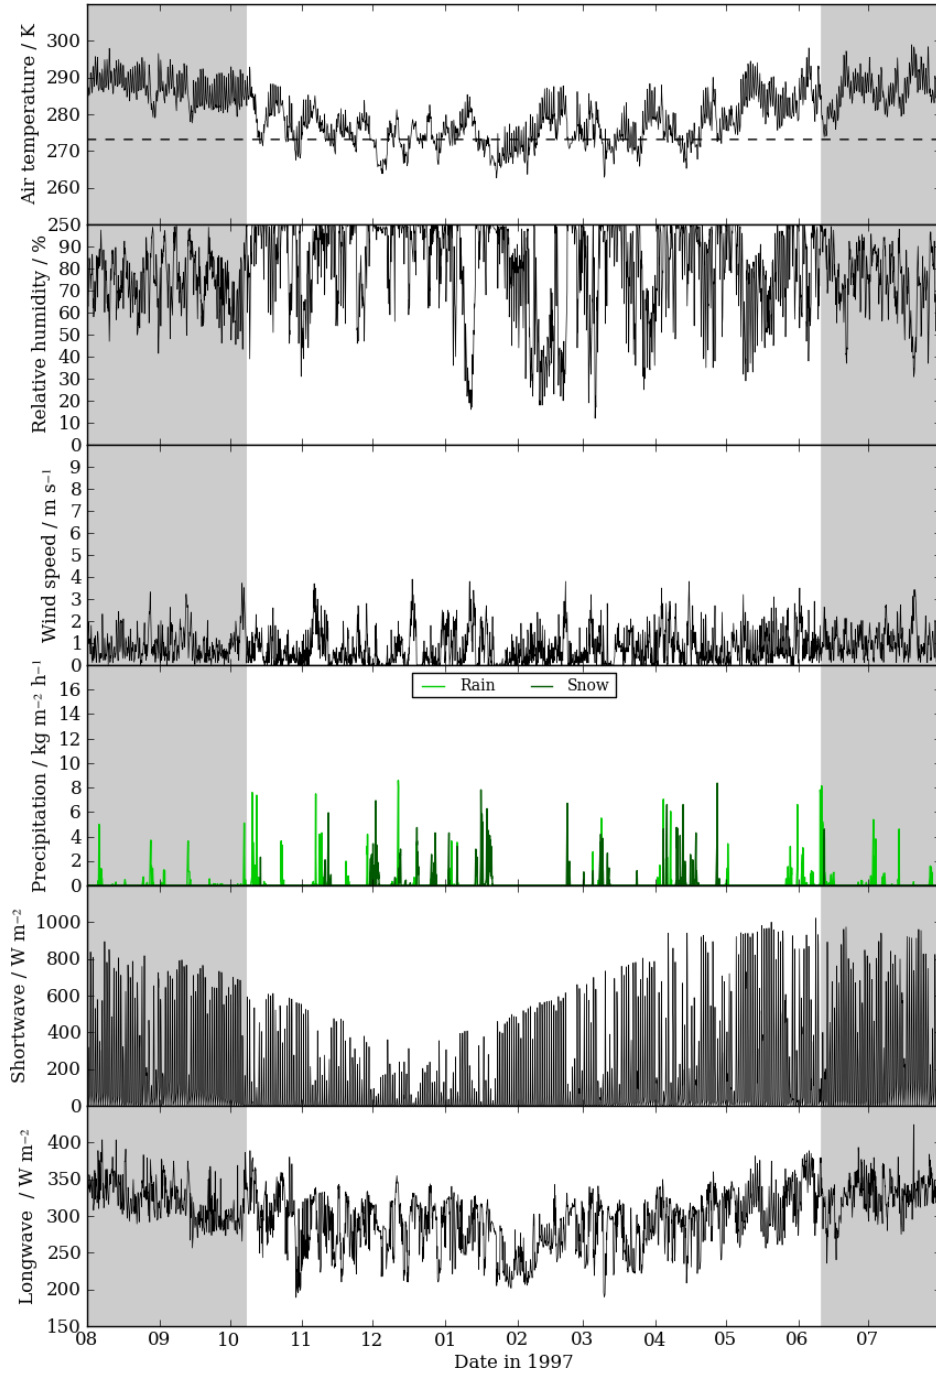

Figure 5: Meteorological data for year 1997-1998.

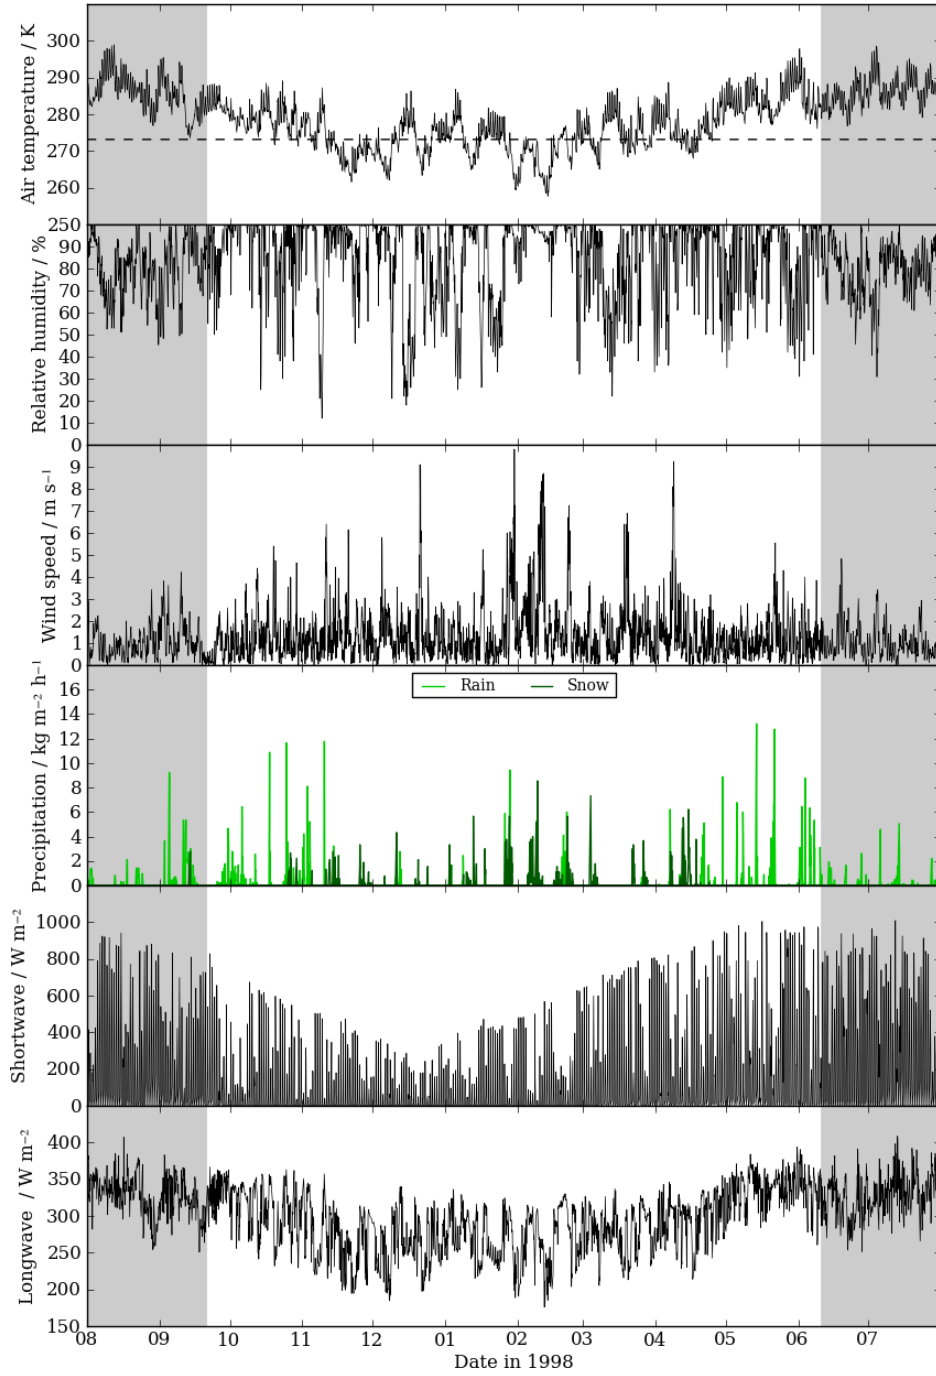

Figure 6: Meteorological data for year 1998-1999.

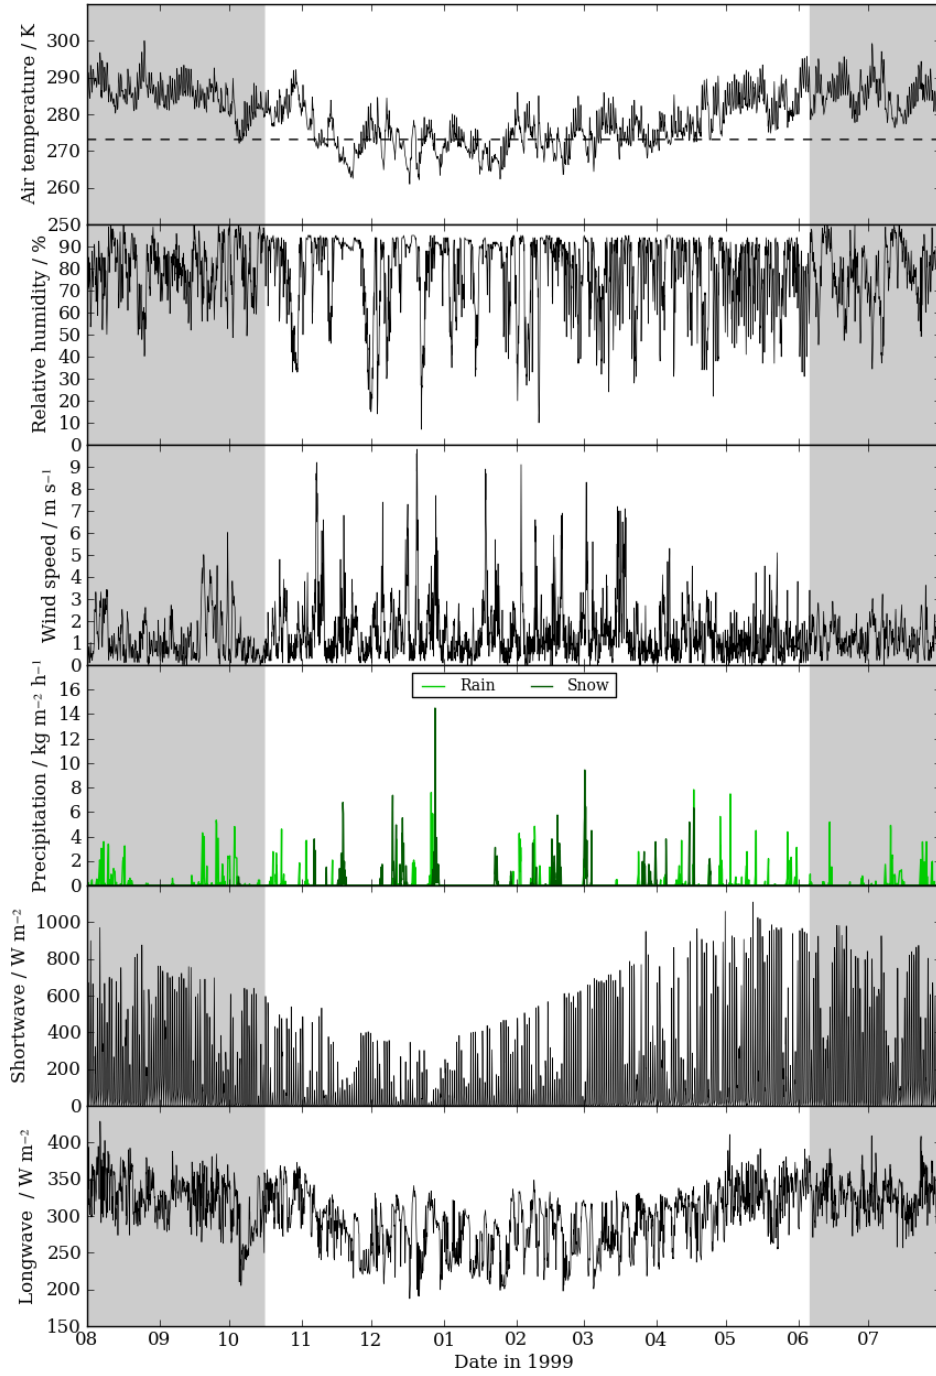

Figure 7: Meteorological data for year 1999-2000.



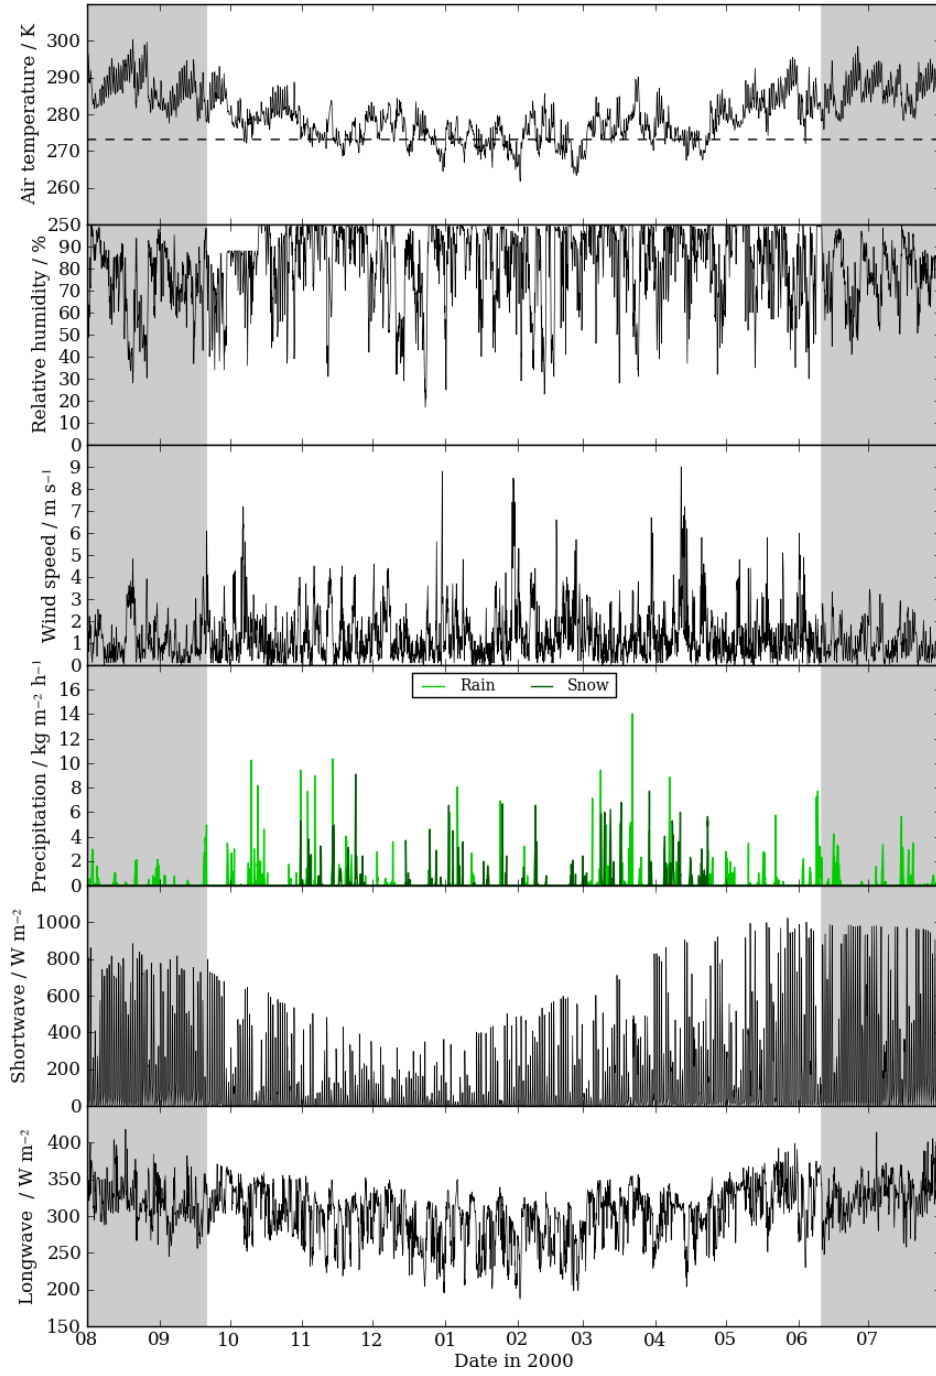

Figure 8: Meteorological data for year 2000-2001.

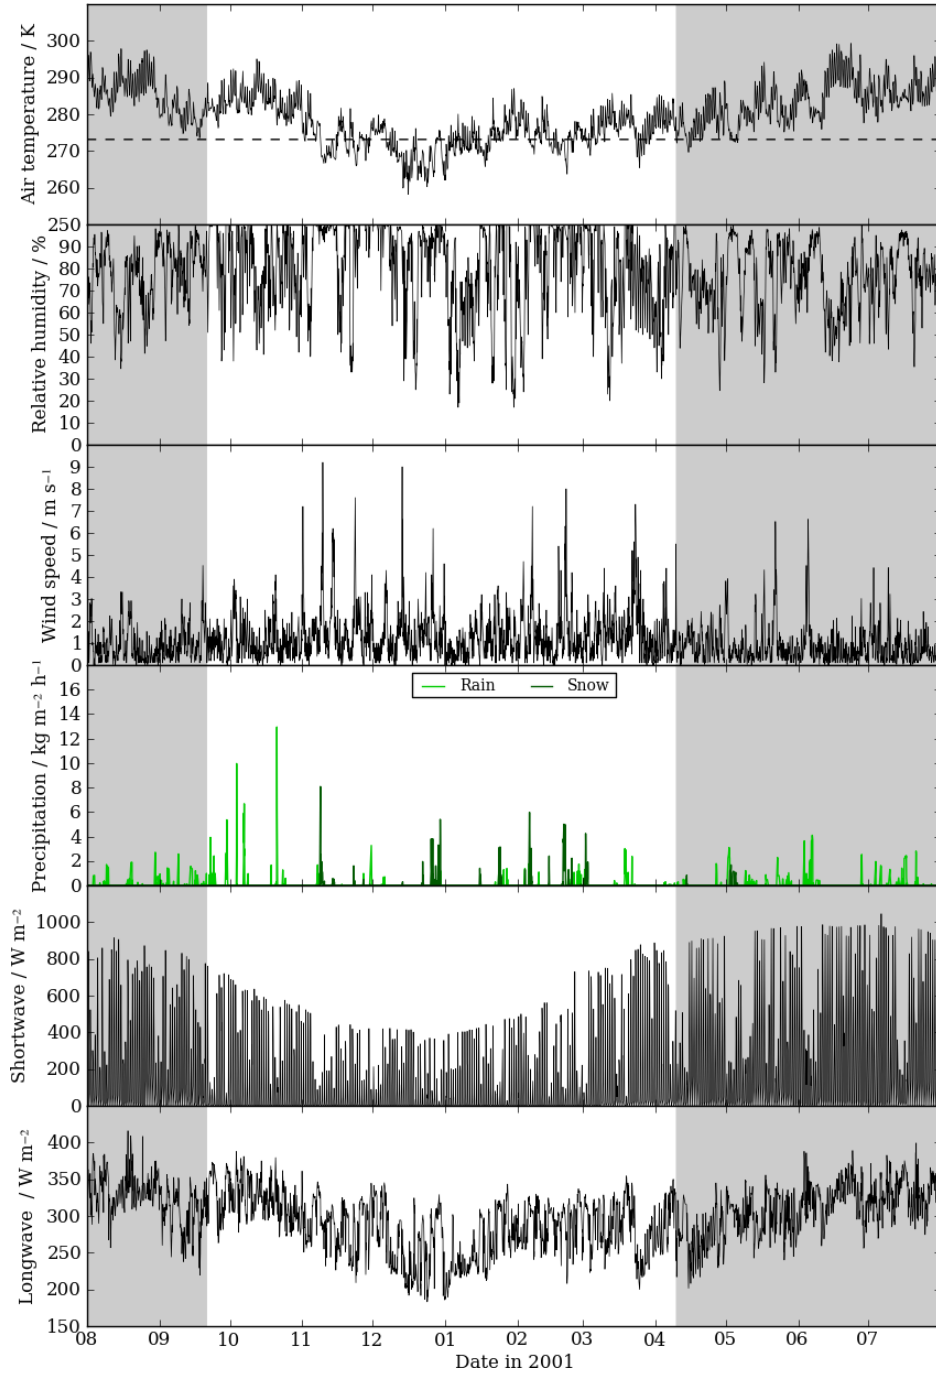

Figure 9: Meteorological data for year 2001-2002.

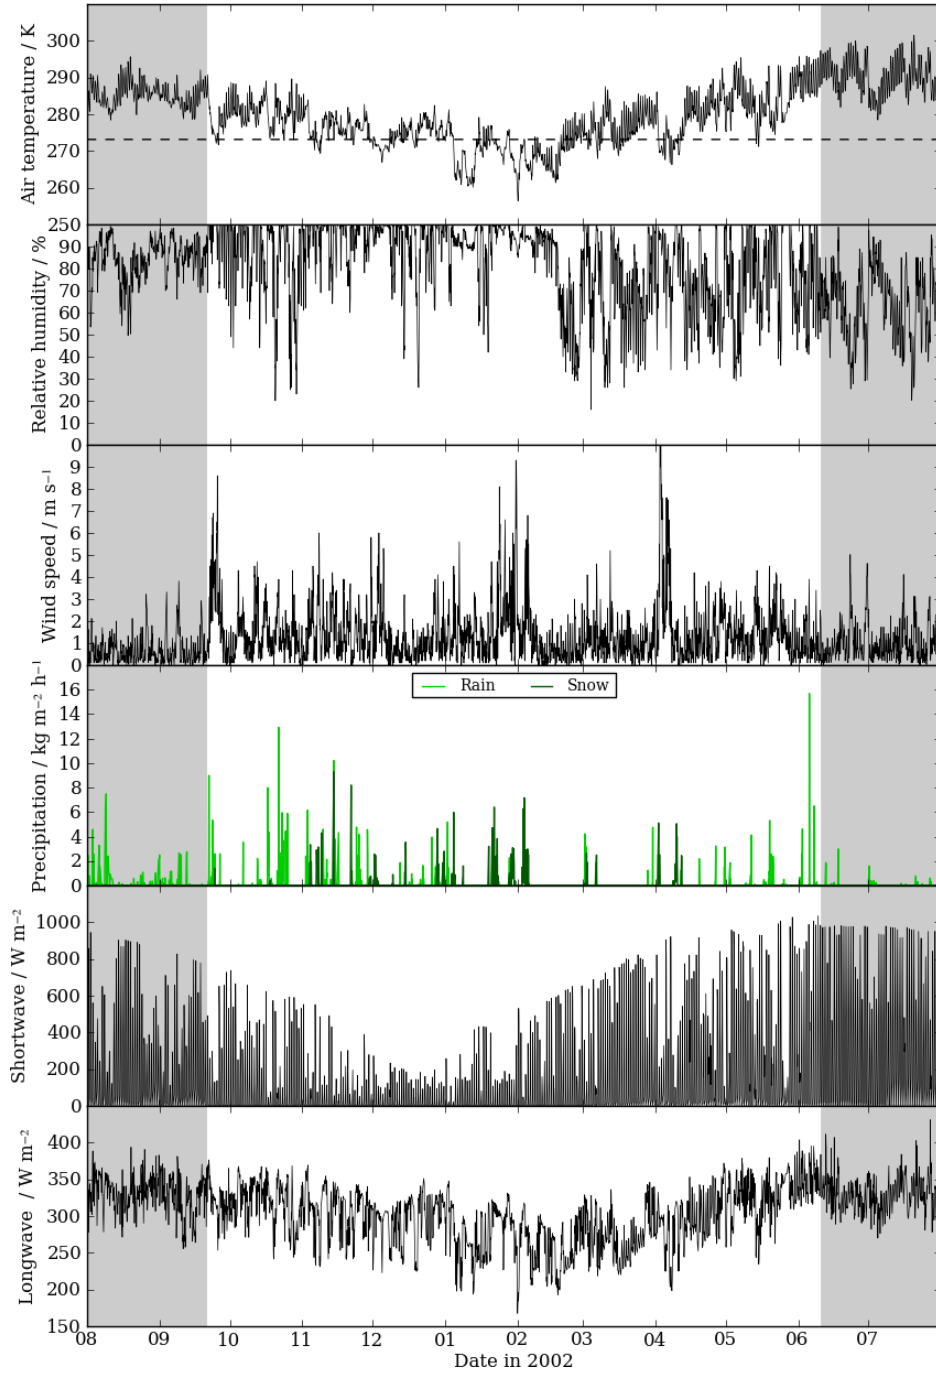

Figure 10: Meteorological data for year 2002-2003.

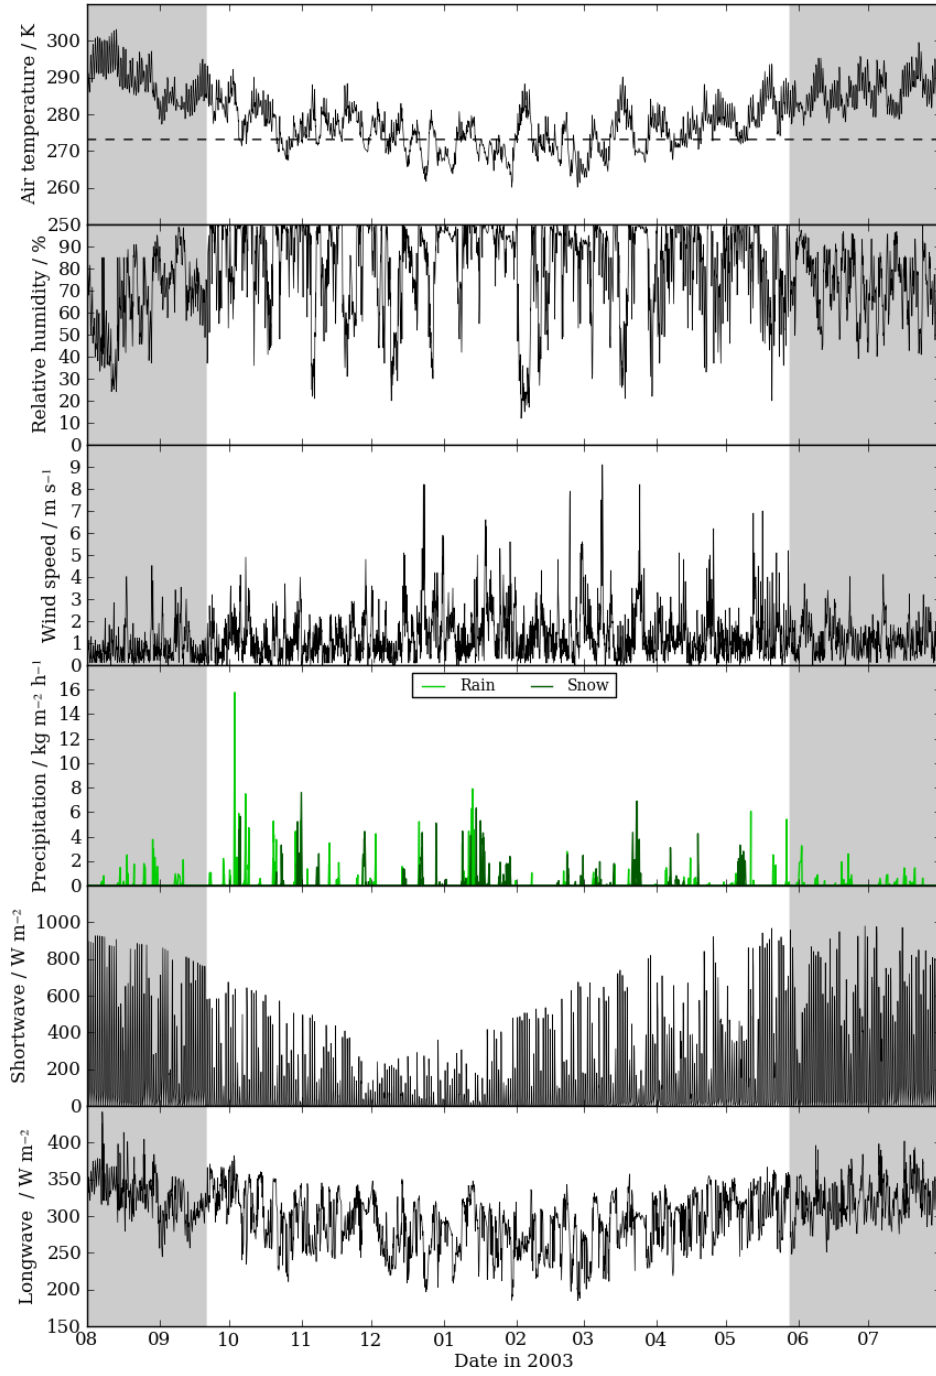

Figure 11: Meteorological data for year 2003-2004.

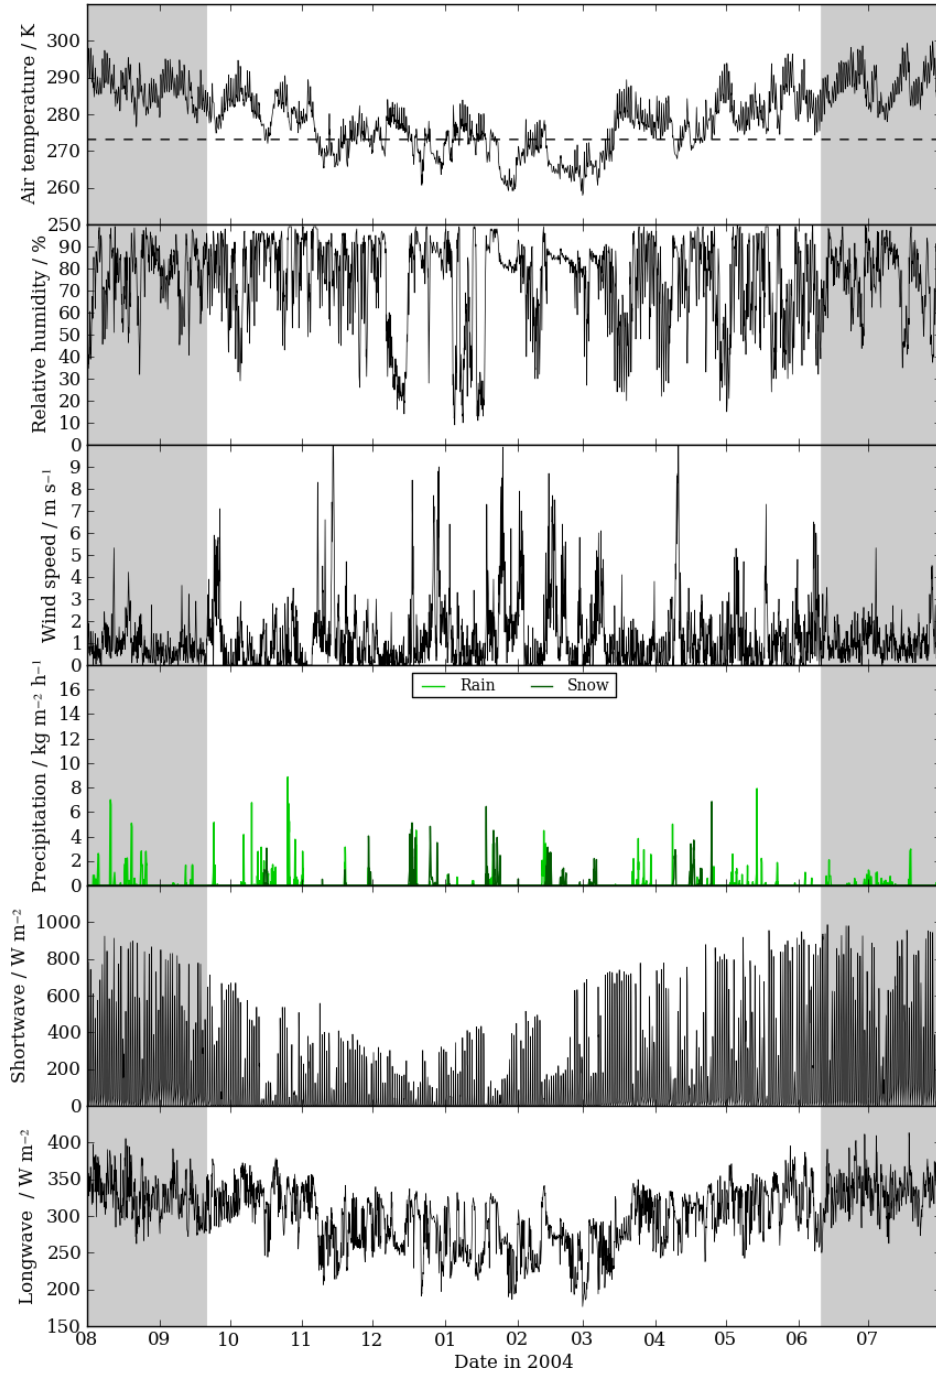

Figure 12: Meteorological data for year 2004-2005.

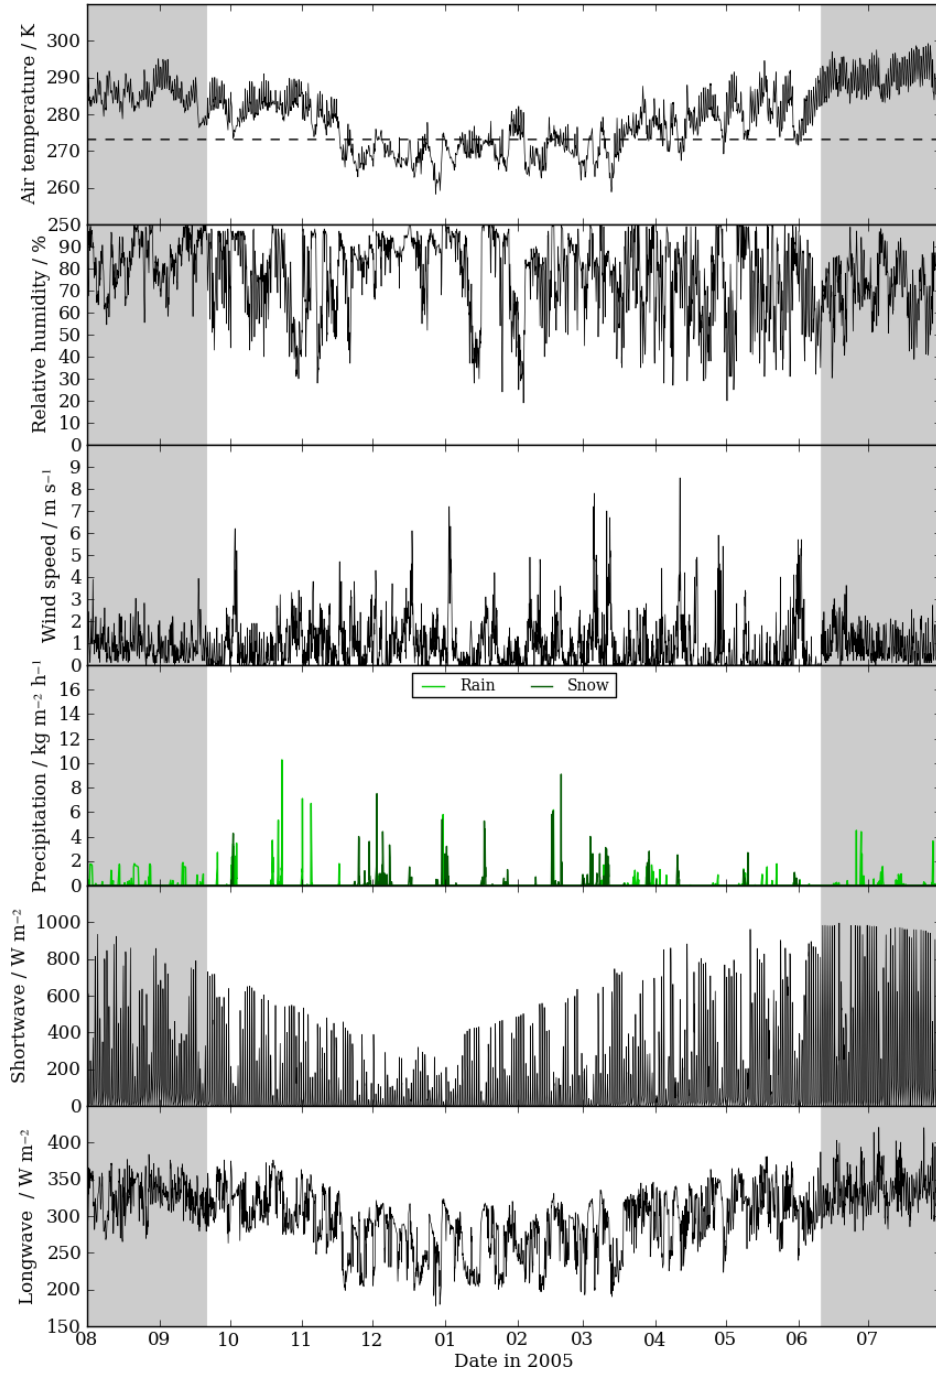

Figure 13: Meteorological data for year 2005-2006.

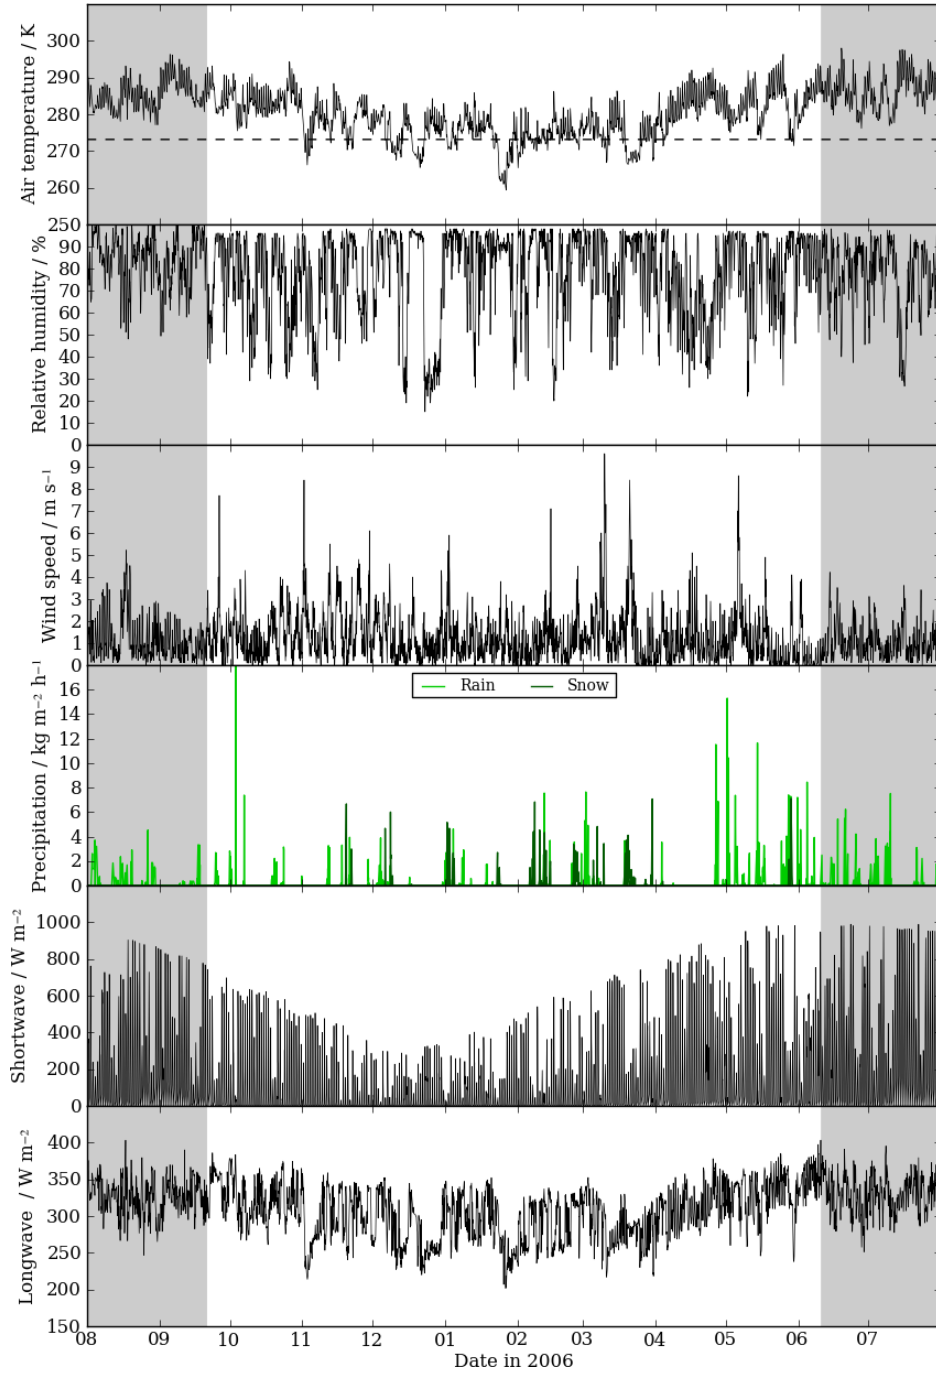

Figure 14: Meteorological data for year 2006-2007.

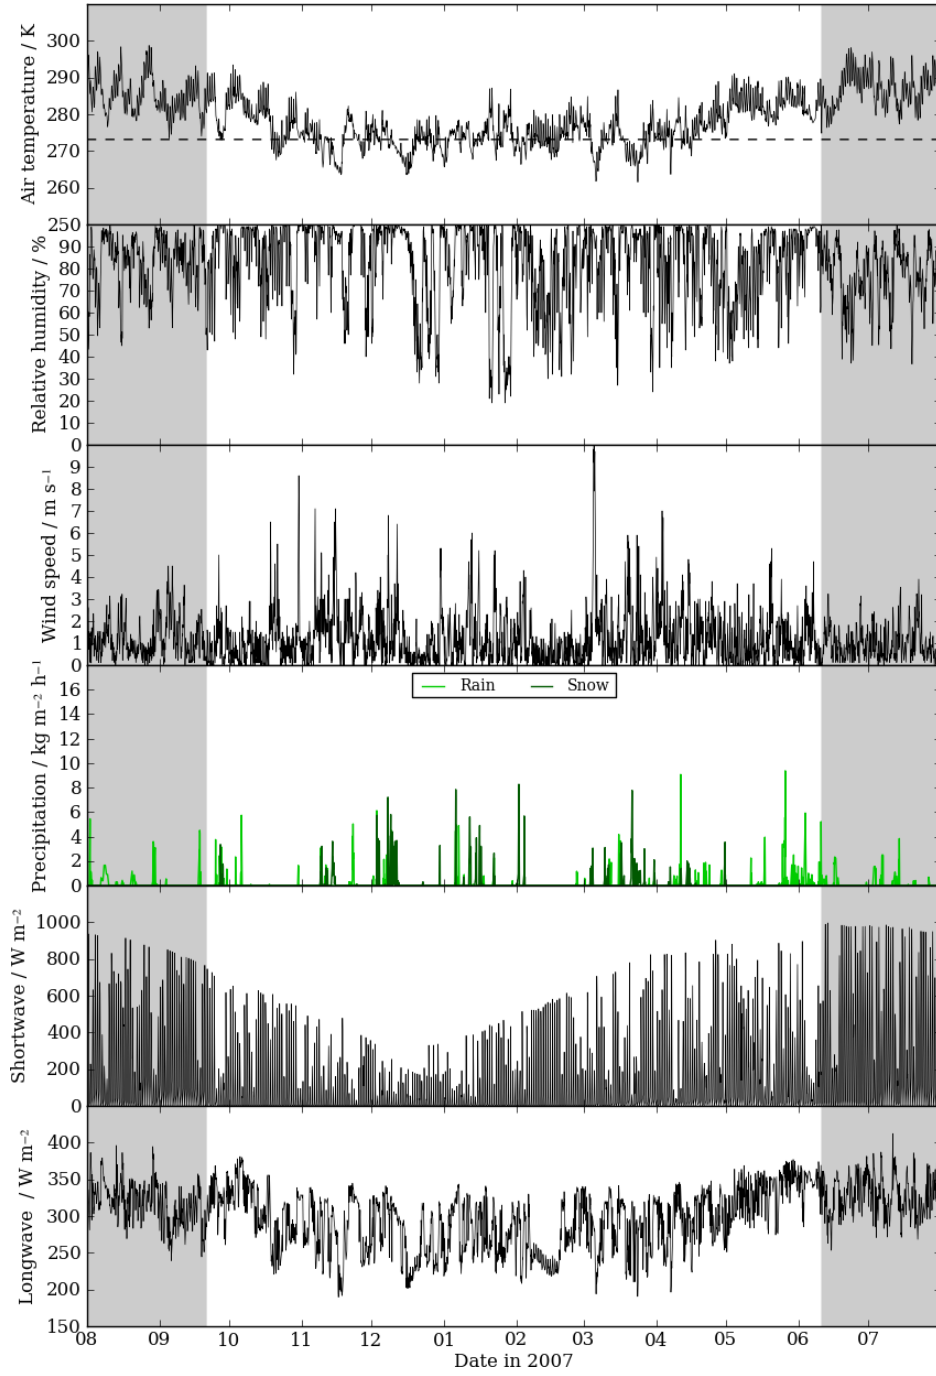

Figure 15: Meteorological data for year 2007-2008.



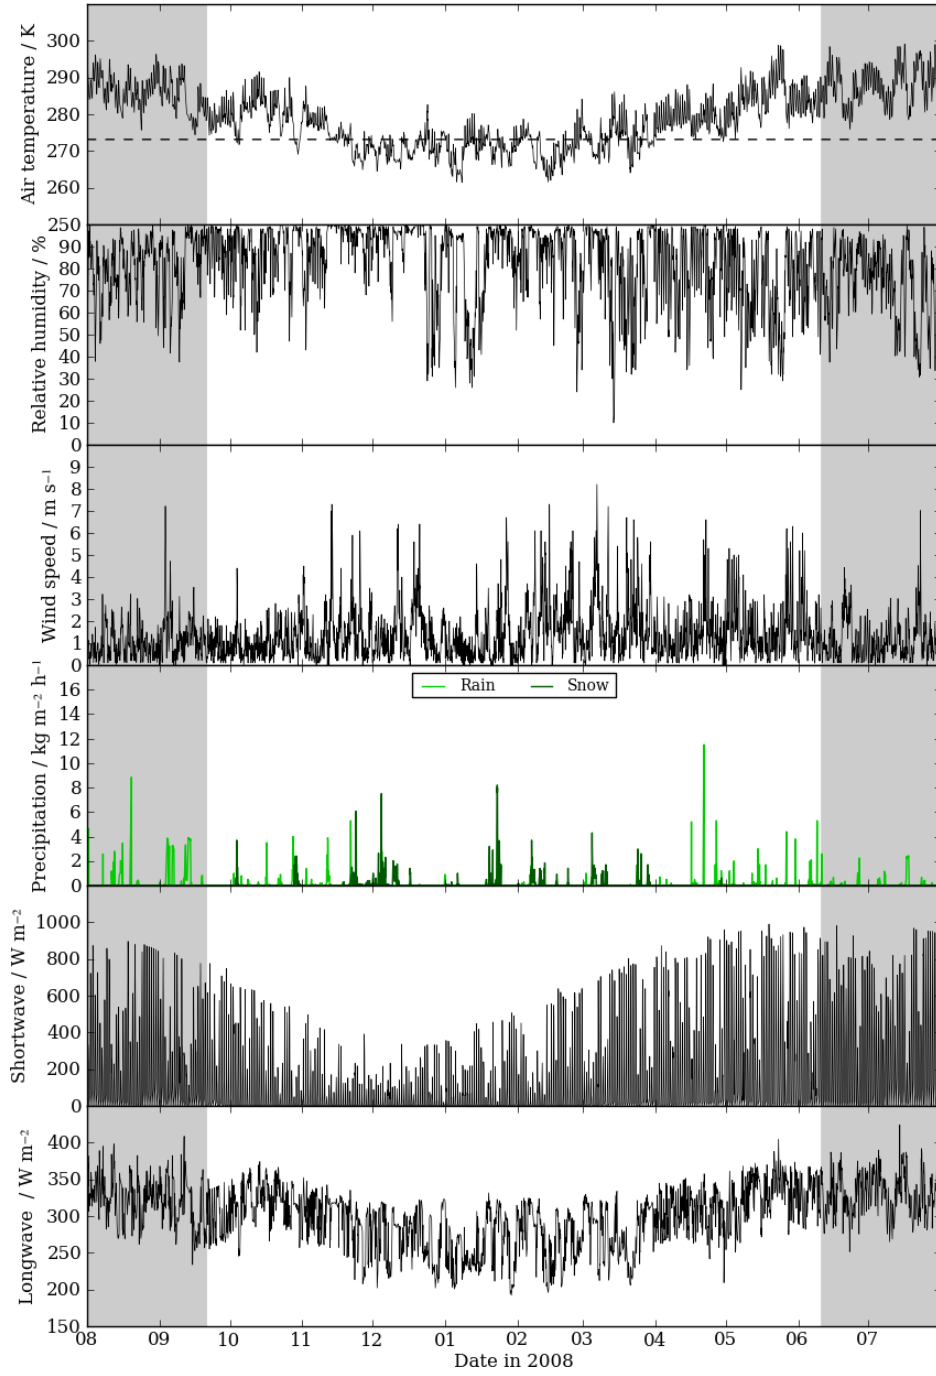

Figure 16: Meteorological data for year 2008-2009.

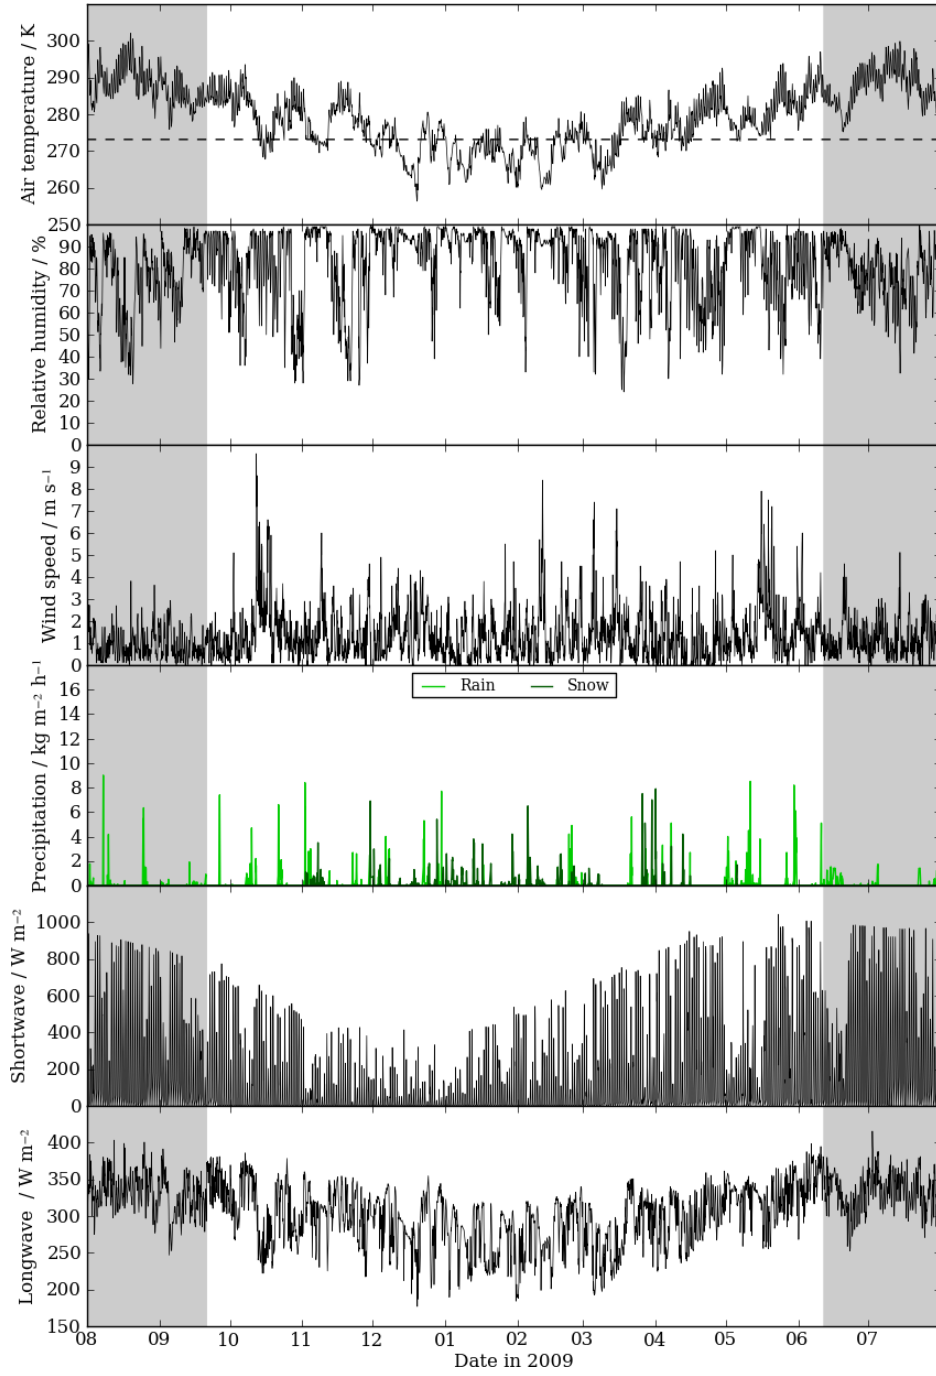

Figure 17: Meteorological data for year 2009-2010.

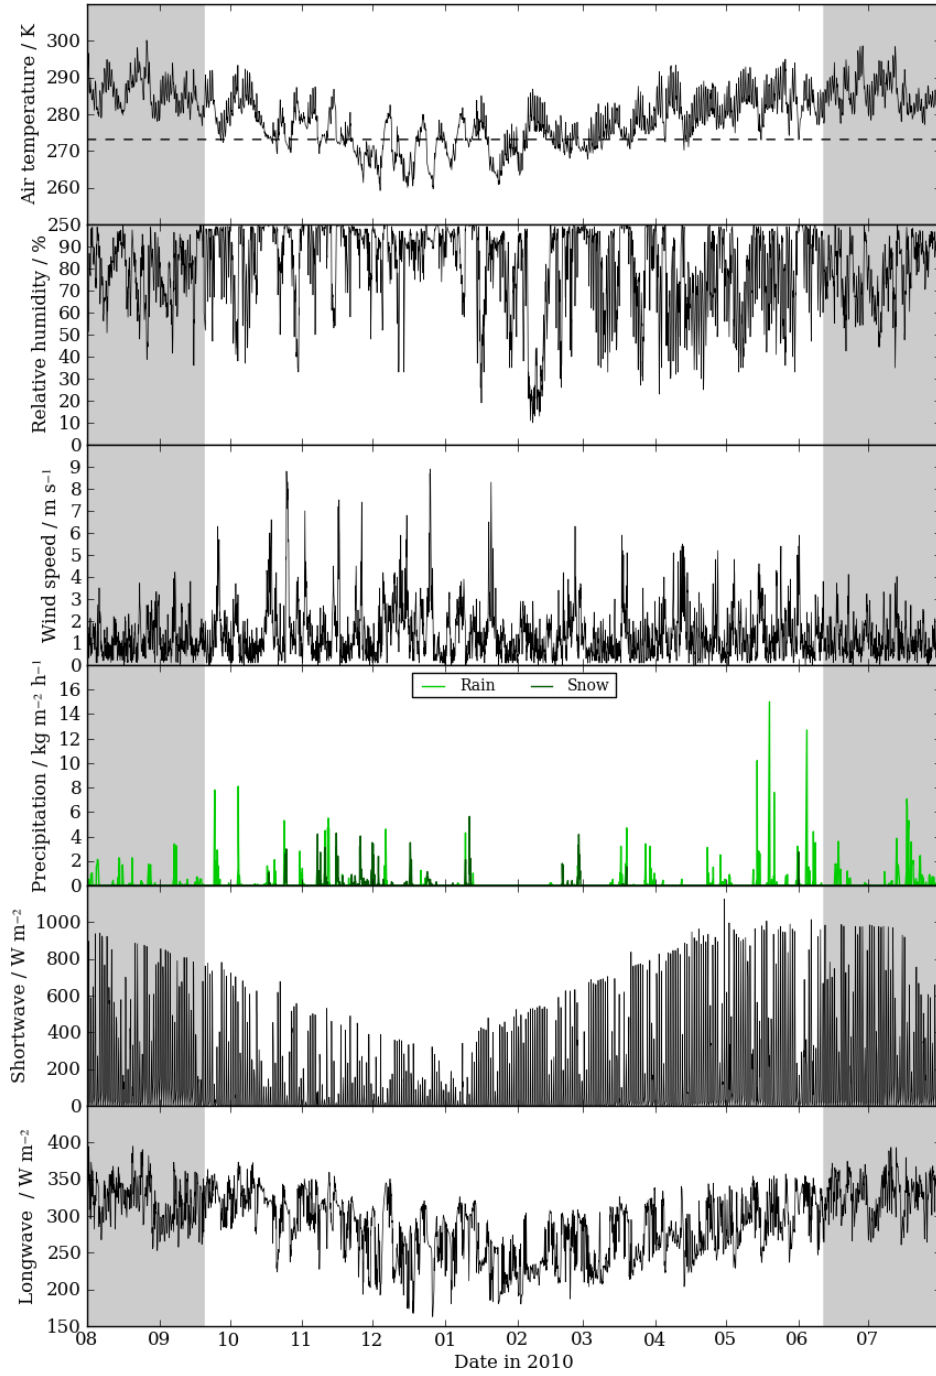

Figure 18: Meteorological data for year 2010-2011.
